## Antibiotic prescribing and expenditures in outpatient paediatrics in Greece, 2010–13

Georgia Kourlaba<sup>1\*</sup>, Eleni Kourkouni<sup>1</sup>, Nikos Spyridis<sup>2</sup>, Jeffrey S. Gerber<sup>3</sup>, John Kopsidas<sup>1</sup>, Katerina Mougkou<sup>1</sup>, Athanasia Lourida<sup>1</sup> and Theoklis E. Zaoutis<sup>1,3</sup>

<sup>1</sup>The Stavros Niarchos Foundation - Collaborative Center for Clinical Epidemiology and Outcomes Research (CLEO), University of Athens School of Medicine, Athens, Greece; <sup>2</sup>Aglaia Kyriakou Children's Hospital, Second Department of Pediatrics, University of Athens School of Medicine, Athens, Greece; <sup>3</sup>Division of Infectious Diseases, Children's Hospital of Philadelphia, UPENN School of Medicine, Philadelphia, PA, USA

\*Corresponding author. Tel: +30-210-7467670; Fax: +30-210-7467670; E-mail: kurlaba@gmail.com

Received 30 October 2014; returned 4 February 2015; revised 14 March 2015; accepted 18 March 2015

**Objectives:** The objectives of this study were to provide a nationally representative analysis of antibiotic prescribing in outpatient paediatrics and to assess overall and class-specific antibiotic costs in Greece.

**Methods:** Data on antibiotic prescriptions for patients aged  $\leq 19$  years old between July 2010 and June 2013 in Greece were extracted from the IMS Health Xponent database. Antibiotics were grouped into narrow- and broad-spectrum agents. The number of prescribed antibiotics and census denominators were used to calculate prescribing rates. The total costs associated with prescribed antibiotics were calculated.

**Results:** More than 7 million antibiotics were prescribed during the study period, with an annual rate of 1100 antibiotics/1000 persons. Prescribing rates were higher among children aged  $< 10$  years old. Acute respiratory tract infections (ARTIs) accounted for 80% of prescribed antibiotics, with acute otitis media (22.3%), acute tonsillitis (19.5%) and acute bronchitis/bronchiolitis (13.9%) being the most common clinical diagnoses. Cephalosporins (32.9%), penicillins (32.3%) and macrolides (32.1%) were the most commonly prescribed antibiotic classes. The majority (90.4%) of antibiotics were broad spectrum. Antibiotic expenditures totalled  $\sim$ €50 million.

**Conclusions:** Broad-spectrum antibiotic prescribing is common in outpatient paediatric patients. These data provide important targets to inform the development of an outpatient antimicrobial stewardship programme targeting specific practices, providers and conditions.

**Keywords:** antimicrobial prescription, ambulatory paediatric patients, acute respiratory infections, cost

### Introduction

In the EU, antibiotic prescribing is highest in young children<sup>1,2</sup> and outpatient acute respiratory tract infections (ARTIs) account for the majority of these prescriptions.<sup>2,3</sup> It has been estimated that almost 50% of antibiotic prescriptions given to children are unnecessary or inappropriate.<sup>4</sup>

There is accumulating evidence linking overuse/misuse of antibiotics to increased antibiotic resistance and increased healthcare costs.<sup>5,6</sup> This problem is more pronounced in Greece, which has the highest rates of antibiotic consumption and antibiotic resistance compared with other European countries.<sup>7</sup> Recently, Greece has experienced a significant economic crisis, which has resulted in healthcare budgetary constraints. In this context, the reduction of healthcare costs is, more than ever before, a top priority for policy makers. Therefore, curtailing inappropriate antibiotic prescribing in Greece could be

an effective method to lower costs and reduce antibiotic resistance pressure.

To most effectively target interventions to improve outpatient antibiotic prescribing in Greece, it is critical to first understand prescribing patterns. Although national data on antibiotic prescribing for children are available for many European countries,<sup>1,8–11</sup> such data are lacking for Greece.

Hence, we aimed to generate a nationally representative analysis of antibiotic prescribing in outpatient paediatrics and to assess overall and class-specific antibiotic costs in Greece.

### Methods

#### Data source and design

The IMS Health Xponent Greece database was used to obtain data on the annual incidence of and indications for antibiotic prescriptions in the

paediatric outpatient setting (0–19 years old) between July 2010 and June 2013 in Greece. Xponent is a unique source of data capturing local and regional prescription drug dispensing.

This database contains longitudinal data that represent a 100% projection of prescribing activity in the community on the basis of prescriptions given by a random cluster sample, by specialty and region, of 625 physicians (2.5% of all doctors in Greece). IMS data directly link antibiotic prescriptions to the clinical indications. We restricted the analysis to the most common clinical diagnoses for which antibiotics were prescribed.

### Antibiotic classification

Antibiotic prescriptions were categorized into two groups: narrow-spectrum antibiotics, which included narrow-spectrum penicillins (i.e. pivmecillinam, penicillin and amoxicillin); and broad-spectrum antibiotics, which included all other systemic antibiotics, as suggested by European Surveillance of Antimicrobial Consumption (ESAC) and National Institute for Health and Care Excellence (NICE) guidelines.

### Cost data

The total antibiotic expenditures for outpatient paediatrics from the perspective of the national health insurance (EOPYY) were calculated by combining the daily dose, frequency and duration of each prescribed antibiotic with the corresponding reimbursed drug prices. These prices were obtained from the reimbursed drug list published by the Ministry of Health, reduced by the patient relevant copayment (25%). Costing data reflect the year 2013.

### Statistical analysis

All collected variables were analysed descriptively. Nominal variables were analysed using frequencies and percentages. In order to calculate antibiotic prescribing rates, we used the number of antibiotics prescribed and census denominators from the Hellenic Statistical Authority ([www.statistics.gr](http://www.statistics.gr)). Analyses were performed using SPSS 20.

## Results

### Antibiotic prescribing patterns

During the study period, an estimated 7 million antibiotic prescriptions were given to paediatric outpatients, resulting in an annual rate of 1100 antibiotics/1000 persons (95% CI: 1099–1101) (Table 1). Antibiotic prescribing rates were higher among children <10 years old (1632 prescriptions/1000 persons) compared with older children aged 10–19 years (579 prescriptions/1000 persons). Time trend analysis for the period under investigation showed a decline of 21.3% for the prescription of antibiotics between July 2010 and June 2013, although no statistically significant trend was detected.

The majority of prescribed antibiotics (90.4%) were broad spectrum. The most commonly prescribed antibiotic agents were cephalosporins (32.9%), penicillins (32.3%, of which only 1.1% were narrow spectrum) and macrolides (32.1%). Specifically, clarithromycin (25%), amoxicillin/clavulanic acid (22.6%) and cefprozil (18.4%) represented 66% of all prescribed antibiotics. Amoxicillin was prescribed for only 8.5% of patients (Table 2).

### Antibiotic prescribing across clinical diagnoses

ARTIs accounted for 80% of all antibiotics prescribed, with acute otitis media (22.3%), acute tonsillitis (19.5%) and acute

**Table 1.** Antibiotic prescribing rates in outpatient paediatrics in Greece for the period July 2010–June 2013

|             | Number of prescribed antibiotics (millions) | Greek population 2011 <sup>a</sup> | Prescriptions per 1000 persons per year (95% CI) |
|-------------|---------------------------------------------|------------------------------------|--------------------------------------------------|
| Age (years) |                                             |                                    |                                                  |
| 0 to <1     | 0.359                                       | 103 877                            | 1152 (1148–1156)                                 |
| 1–4         | 2.548                                       | 433 366                            | 1960 (1957–1962)                                 |
| 5–9         | 2.234                                       | 512 596                            | 1453 (1451–1455)                                 |
| 10–14       | 0.873                                       | 519 429                            | 560 (559–561)                                    |
| 15–19       | 0.991                                       | 553 276                            | 597 (596–598)                                    |
| Total       | 7.005                                       | 2 122 544                          | 1100 (1099–1101)                                 |

<sup>a</sup>Based on the 2011 census ([www.statistics.gr](http://www.statistics.gr)).

bronchitis/bronchiolitis (13.9%) being the most common clinical diagnoses (Table 2).

Broad-spectrum antibiotics were prescribed for 83.9%, 94.4% and 87.3% of acute otitis media, acute tonsillitis and acute bronchitis/bronchiolitis episodes, respectively.

Clarithromycin was the most commonly prescribed antibiotic for acute tonsillitis (36.4%) and acute bronchitis/bronchiolitis (40.2%), while amoxicillin/clavulanic acid was the most commonly prescribed antibiotic for acute otitis media (31.7%).

### Antibiotic expenditures

During the 3 year study period, the total expenditures for prescribed antibiotics were ~€50 million. Cephalosporins and macrolides each represented 40% of the total expenditures for antibiotics. Clarithromycin alone accounted for almost one-third (32.7% or €16.1 million) of the total antibiotic expenditures, followed by cefprozil (21.9% or €10.8 million). Although amoxicillin/clavulanic acid was the second most frequently prescribed antibiotic, only 13.1% (€6.5 million) of the total antibiotic expenditure was attributed to this agent (Table 2).

## Discussion

Several studies have monitored outpatient antibiotic consumption in the general population. For example, ESAC, a network of national surveillance systems, collects comparable and reliable data on antibiotic use across various countries including Greece.<sup>7</sup> When reporting antibiotic consumption in the total population (adults included), consumption was much higher in Greece compared with most other countries. In the present study, we focused on the paediatric population, which is known to have higher rates of prescribing. To the best of our knowledge, this is the first study describing antibiotic prescribing patterns in ambulatory paediatrics in Greece.

We found a high annual rate of antibiotic prescribing in outpatient paediatrics in Greece, but this decreased over time. The vast majority of antibiotics prescribed were broad spectrum, with clarithromycin, amoxicillin/clavulanic acid and oral cephalosporins being the most commonly prescribed antibiotics as

**Table 2.** Antibiotic prescribing patterns and expenditures in outpatient paediatrics in Greece for the period July 2010–June 2013

|                                                                 | Number of prescribed antibiotics (in millions) | Percentage of prescribed antibiotics | Expenditures (in €) | Percentage of total expenditures |
|-----------------------------------------------------------------|------------------------------------------------|--------------------------------------|---------------------|----------------------------------|
| Total                                                           | 7.005                                          |                                      | 49176361            |                                  |
| Type of antibiotics                                             |                                                |                                      |                     |                                  |
| cephalosporins                                                  | 2.305                                          | 32.9                                 | 19774139            | 40.21                            |
| macrolides                                                      | 2.246                                          | 32.1                                 | 19712793            | 40.09                            |
| penicillins                                                     | 2.260                                          | 32.3                                 | 8560851             | 17.41                            |
| tetracyclines                                                   | 0.086                                          | 1.2                                  | 366624              | 0.75                             |
| trimethoprim                                                    | 0.060                                          | 0.9                                  | 98733               | 0.20                             |
| fluoroquinolones                                                | 0.036                                          | 0.5                                  | 459629              | 0.93                             |
| other $\beta$ -lactams excluding penicillins and cephalosporins | 0.012                                          | 0.2                                  | 203591              | 0.41                             |
| Antibiotic                                                      |                                                |                                      |                     |                                  |
| clarithromycin                                                  | 1.752                                          | 25.0                                 | 16095485            | 32.73                            |
| amoxicillin/clavulanic acid                                     | 1.582                                          | 22.6                                 | 6458358             | 13.13                            |
| cefprozil                                                       | 1.289                                          | 18.4                                 | 10752742            | 21.87                            |
| amoxicillin                                                     | 0.596                                          | 8.5                                  | 1639687             | 3.33                             |
| cefaclor                                                        | 0.536                                          | 7.7                                  | 3946483             | 8.03                             |
| cefuroxime                                                      | 0.453                                          | 6.5                                  | 4893132             | 9.95                             |
| azithromycin                                                    | 0.438                                          | 6.2                                  | 3236451             | 6.58                             |
| penicillins                                                     | 0.079                                          | 1.1                                  | 446015              | 0.91                             |
| Broad versus narrow spectrum                                    |                                                |                                      |                     |                                  |
| narrow spectrum                                                 | 0.676                                          | 9.6                                  | 2096610             | 4.26                             |
| broad spectrum                                                  | 6.329                                          | 90.4                                 | 47079750            | 95.74                            |
| Clinical diagnosis                                              |                                                |                                      |                     |                                  |
| acute otitis media                                              | 1.560                                          | 22.3                                 | 9954119             | 20.24                            |
| acute/chronic sinusitis                                         | 0.204                                          | 2.9                                  | 1710229             | 3.48                             |
| acute tonsillitis                                               | 1.369                                          | 19.5                                 | 10968513            | 22.30                            |
| acute bronchitis/bronchiolitis                                  | 0.975                                          | 13.9                                 | 6897667             | 14.03                            |
| cystitis/other urinary tract infections                         | 0.281                                          | 4.0                                  | 1831919             | 3.72                             |
| acute pharyngitis                                               | 0.340                                          | 4.9                                  | 2302502             | 4.68                             |
| acute lower respiratory infections                              | 0.242                                          | 3.5                                  | 3339988             | 6.79                             |
| other                                                           | 2.033                                          | 29.0                                 | 12171422            | 24.75                            |

Narrow-spectrum antibiotics included amoxicillin and penicillin.

opposed to amoxicillin. Eighty percent of antibiotic use was for ARTIs. Antibiotic prescriptions represented a significant health-care expenditure for the national healthcare system.

Antibiotic prescribing rates identified in our study are consistent with those reported in previous studies, indicating that the rate is higher in young children and decreases with age.<sup>8,12,13</sup> Comparing the overall estimated antibiotic prescription rate in Greece with that provided in other countries for corresponding populations, we reveal that our rate (1.1/person-year) is amongst the highest along with Italy (1.3/person-year in children  $\leq 13$  years in 2006)<sup>9</sup> and Canada (0.9/person-year in children  $< 19$  years in 2001)<sup>14</sup> in contrast to rates reported in Germany (0.7/person-year in 2004–06).<sup>8</sup> These comparative data raise concerns about the appropriateness of antibiotic prescribing for children in Greece.

As for antibiotic prescribing across diagnostic conditions, our results revealed that ARTIs accounted for 80% of total antibiotic

prescriptions in outpatient paediatrics, slightly higher than that reported in a corresponding population in the USA (i.e. almost 75%).<sup>12</sup> Professional guidelines from the USA and other European countries support the treatment of most bacterial ARTIs with narrow-spectrum antibiotics,<sup>15,16</sup> which is at odds with the high rate of broad-spectrum antibiotic prescribing. The implications of antibiotic overuse are profound. Considering that  $> 6$  million broad-spectrum antibiotics were prescribed to children in Greece during the study period, an intervention that could produce a modest 10% reduction in broad-spectrum prescribing would result in  $\sim 600\,000$  fewer unnecessary broad-spectrum antibiotic prescriptions and savings of  $\sim \text{€}4.7$  million to the national health-care system.

Overall, our study indicates that antibiotic overprescribing is a significant problem in Greece. These data provide important targets for interventions to improve judicious antibiotic prescribing. Parental pressure to prescribe antibiotics and inadequate

knowledge around appropriate utilization of antibiotics are some of the factors leading to antibiotic overuse.<sup>17</sup> There are many examples of countries that have succeeded in reducing the amount of antibiotics prescribed to children, including the Netherlands, Sweden and the USA, after promoting rational antibiotic prescribing by educational, antimicrobial stewardship with feedback and regulations.<sup>18,19</sup>

Our study had several limitations. First, IMS data are obtained from a sample of 625 practitioners. Although selected following a cluster procedure by specialty and region, the sample may not be representative of the population of physicians and region under study. Second, we report on antibiotic prescriptions not actual antibiotic use, as we did not capture antibiotics dispensed by pharmacists without a physician's prescription, a not uncommon practice in Greece.<sup>20</sup> Third, we believe that our study likely underestimated the national antibiotic prescribing rate because we did not have access to prescribing data from emergency departments and outpatient departments located in hospitals. Fourth, the reasons for the reduction in antibiotic prescriptions over the study period (2010–13) cannot be definitely determined with our data. Finally, it should be noted that the costs related to antibiotic use throughout the study period may be underestimated; drug prices as published at the end of the year 2013 were used in our calculations when there was known to be a sharp reduction in drug prices in Greece.

## Conclusions

In conclusion, we observed a high rate of antibiotic prescribing in outpatient paediatrics in Greece, with clarithromycin, amoxicillin/clavulanic acid and oral cephalosporins being the most commonly prescribed antibiotics as opposed to amoxicillin. These data indicate that broad implementation of outpatient antimicrobial stewardship interventions targeting specific practices, providers and conditions should be a public health priority for Greece.

## Funding

This work was supported by internal funding.

## Transparency declarations

None to declare.

## References

- Clavenna A, Bonati M. Differences in antibiotic prescribing in paediatric outpatients. *Arch Dis Child* 2011; **96**: 590–5.
- Rossignoli A, Clavenna A, Bonati M. Antibiotic prescription and prevalence rate in the outpatient paediatric population: analysis of surveys published during 2000–2005. *Eur J Clin Pharmacol* 2007; **63**: 1099–106.
- Hare ME, Gaur AH, Somes GW et al. Does it really take longer not to prescribe antibiotics for viral respiratory tract infections in children? *Ambul Pediatr* 2006; **6**: 152–6.
- Pichichero ME. Dynamics of antibiotic prescribing for children. *JAMA* 2002; **287**: 3133–5.
- Suda KJ, Hicks LA, Roberts RM et al. A national evaluation of antibiotic expenditures by healthcare setting in the United States, 2009. *J Antimicrob Chemother* 2013; **68**: 715–8.
- Costelloe C, Metcalfe C, Lovering A et al. Effect of antibiotic prescribing in primary care on antimicrobial resistance in individual patients: systematic review and meta-analysis. *BMJ* 2010; **340**: c2096.
- Adriaenssens N, Coenen S, Versporten A et al. European Surveillance of Antimicrobial Consumption (ESAC): outpatient antibiotic use in Europe (1997–2009). *J Antimicrob Chemother* 2011; **66** Suppl 6: vi3–12.
- Holstiege J, Garbe E. Systemic antibiotic use among children and adolescents in Germany: a population-based study. *Eur J Pediatr* 2013; **172**: 787–95.
- Clavenna A, Berti A, Gualandi L et al. Drug utilisation profile in the Italian paediatric population. *Eur J Pediatr* 2009; **168**: 173–80.
- Piovani D, Clavenna A, Cartabia M et al. The regional profile of antibiotic prescriptions in Italian outpatient children. *Eur J Clin Pharmacol* 2012; **68**: 997–1005.
- Dommergues MA, Hentgen V. Decreased paediatric antibiotic consumption in France between 2000 and 2010. *Scand J Infect Dis* 2012; **44**: 495–501.
- Vaz LE, Kleinman KP, Raebel MA et al. Recent trends in outpatient antibiotic use in children. *Pediatrics* 2014; **133**: 375–85.
- Hicks LA, Taylor TH, Hunkler RJ. US outpatient antibiotic prescribing, 2010. *N Engl J Med* 2013; **368**: 1461–2.
- Kozyrskyj AL, Carrie AG, Mazowita GB et al. Decrease in antibiotic use among children in the 1990s: not all antibiotics, not all children. *CMAJ* 2004; **171**: 133–8.
- Chiappini E, Mazzantini R, Bruzzese E et al. Rational use of antibiotics for the management of children's respiratory tract infections in the ambulatory setting: an evidence-based consensus by the Italian Society of Preventive and Social Pediatrics. *Paediatr Respir Rev* 2014; **15**: 231–6.
- Hersh AL, Jackson MA, Hicks LA. Principles of judicious antibiotic prescribing for upper respiratory tract infections in pediatrics. *Pediatrics* 2013; **132**: 1146–54.
- Butler CC, Simpson SA, Dunstan F et al. Effectiveness of multifaceted educational programme to reduce antibiotic dispensing in primary care: practice based randomised controlled trial. *BMJ* 2012; **344**: d8173.
- Grijalva CG, Nuorti JP, Griffin MR. Antibiotic prescription rates for acute respiratory tract infections in US ambulatory settings. *JAMA* 2009; **302**: 758–66.
- Hogberg L, Oke T, Geli P et al. Reduction in outpatient antibiotic sales for pre-school children: interrupted time series analysis of weekly antibiotic sales data in Sweden 1992–2002. *J Antimicrob Chemother* 2005; **56**: 208–15.
- Plachouras D, Kavatha D, Antoniadou A et al. Dispensing of antibiotics without prescription in Greece, 2008: another link in the antibiotic resistance chain. *Euro Surveill* 2010; **15**: pii=19488.
